# Supplementary material for: Magnetic Micro-Solid-Phase Extraction Using a Novel Carbon-Based Composite Coupled with HPLC–MS/MS for Steroid Multiclass Determination in Human Plasma
Source: PubMed Central journal article supplement (PMC8038327; doi:10.3390/molecules26072061), 2021-04-03
Supplement: molecules-26-02061-s001.pdf [file molecules-26-02061-s001.pdf]

## Supplementary Information

### Magnetic micro-solid-phase extraction using a novel carbon-based composite coupled with HPLC-MS/MS for steroid multiclass determination in human plasma

Andrea Speltini<sup>1\*</sup>, Francesca Merlo<sup>2</sup>, Federica Maraschi<sup>2</sup>, Giorgio Marrubini<sup>1</sup>, Anna Faravelli<sup>2</sup> and Antonella Profumo<sup>2\*</sup>

<sup>1</sup> Department of Drug Sciences, University of Pavia, via Taramelli 12, 27100 Pavia, Italy; andrea.speltini@unipv.it; giorgio.marrubini@unipv.it

<sup>2</sup> Department of Chemistry, University of Pavia, via Taramelli 12, 27100 Pavia, Italy; francesca.merlo02@universitadipavia.it; federica.maraschi@unipv.it; anna.faravelli01@universitadipavia.it; antonella.profumo@unipv.it

\* Correspondence: andrea.speltini@unipv.it (A.S.); antonella.profumo@unipv.it (A.P.)  
Tel.: +39 0382 987349

#### Target analytes:

Table S1. Molecular structures and Log $P$  values of the studied steroids (data from <https://hmdb.ca/>).

| Steroid | Molecular structure                                                                 | Log $P$ |
|---------|-------------------------------------------------------------------------------------|---------|
| PREDLO  | 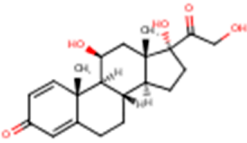 | 1.66    |
| PRED    |  | 2.07    |
| H-CORT  |  | 1.79    |

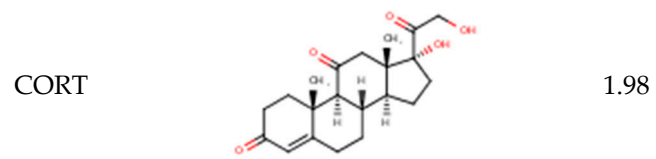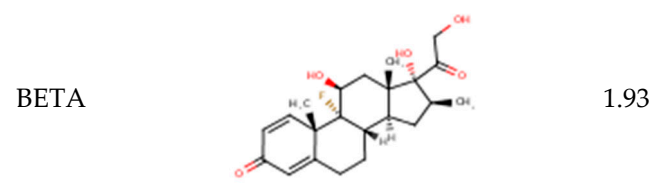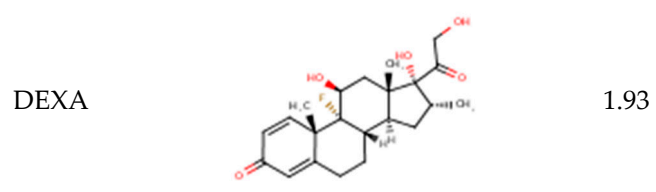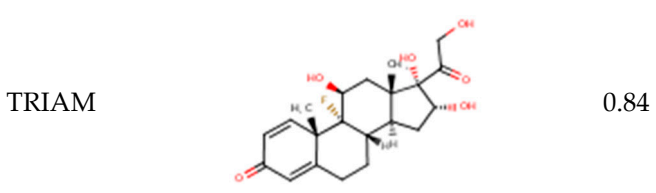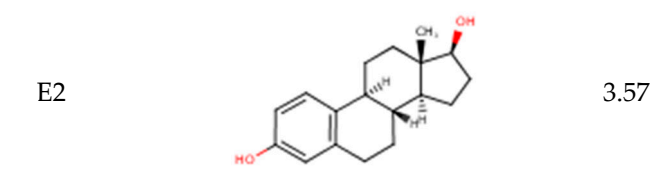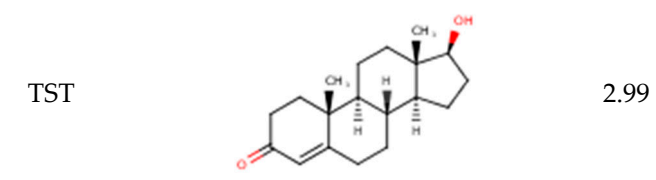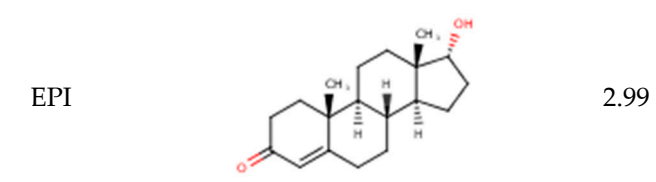

|                   |                                                                                     |      |
|-------------------|-------------------------------------------------------------------------------------|------|
| EE2               | 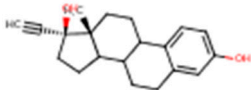   | 3.63 |
| E1                |    | 4.03 |
| H-PROG            |    | 2.99 |
| FLUO <sup>a</sup> |  | 0.58 |
| PROG              |  | 3.58 |
| M-PROG            |  | 3.52 |

<sup>a</sup> data from <https://www.chemspider.com/>

*TEM images:*

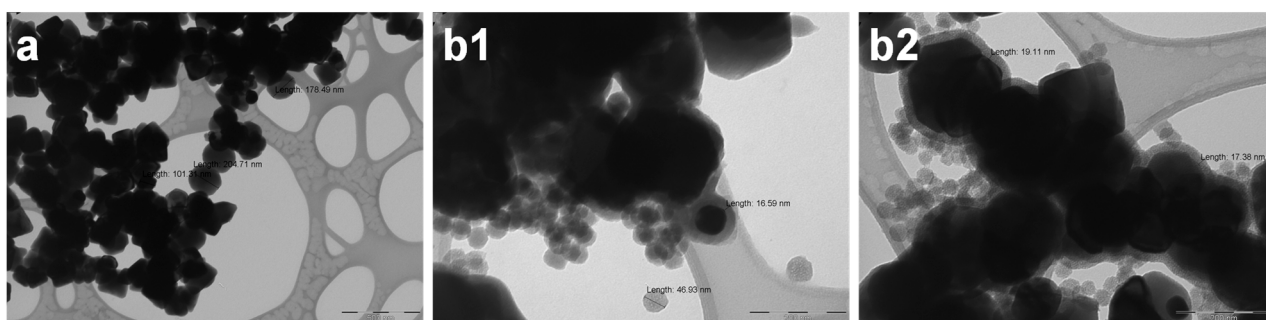

**Figure S1.** Representative TEM images acquired on (a) pristine  $\text{Fe}_3\text{O}_4$  (50 kx) and (b1, b2)  $\text{SiO}_2@\text{Fe}_3\text{O}_4$  (150 kx). The  $\text{Fe}_3\text{O}_4$  particles (black) are coated by silica as both a continuous layer and nanometric spheres (grey); the thickness of the silica layer and the dimensions of the silica and magnetite particles are reported in the figure.

*SEM images:*

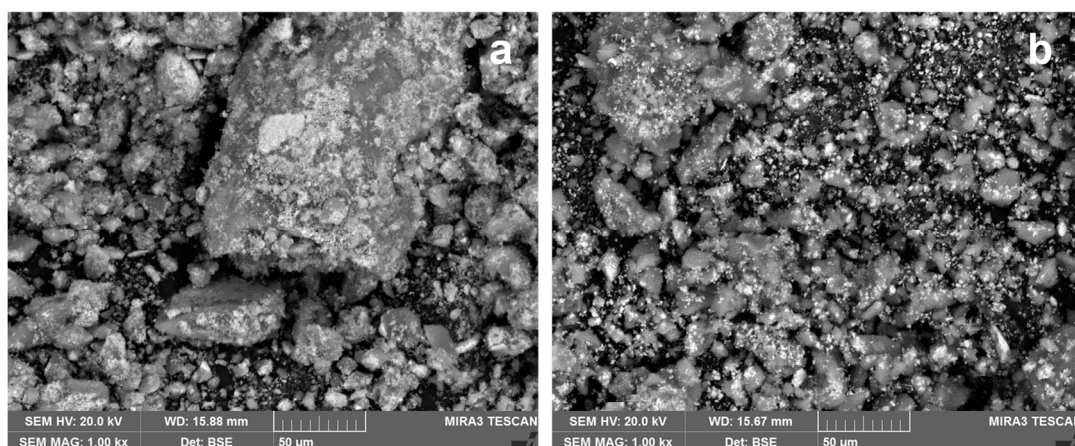

**Figure S2.** Representative SEM images acquired on (a) Magn-Humic and (b) c-Magn-Humic.

TGA profiles:

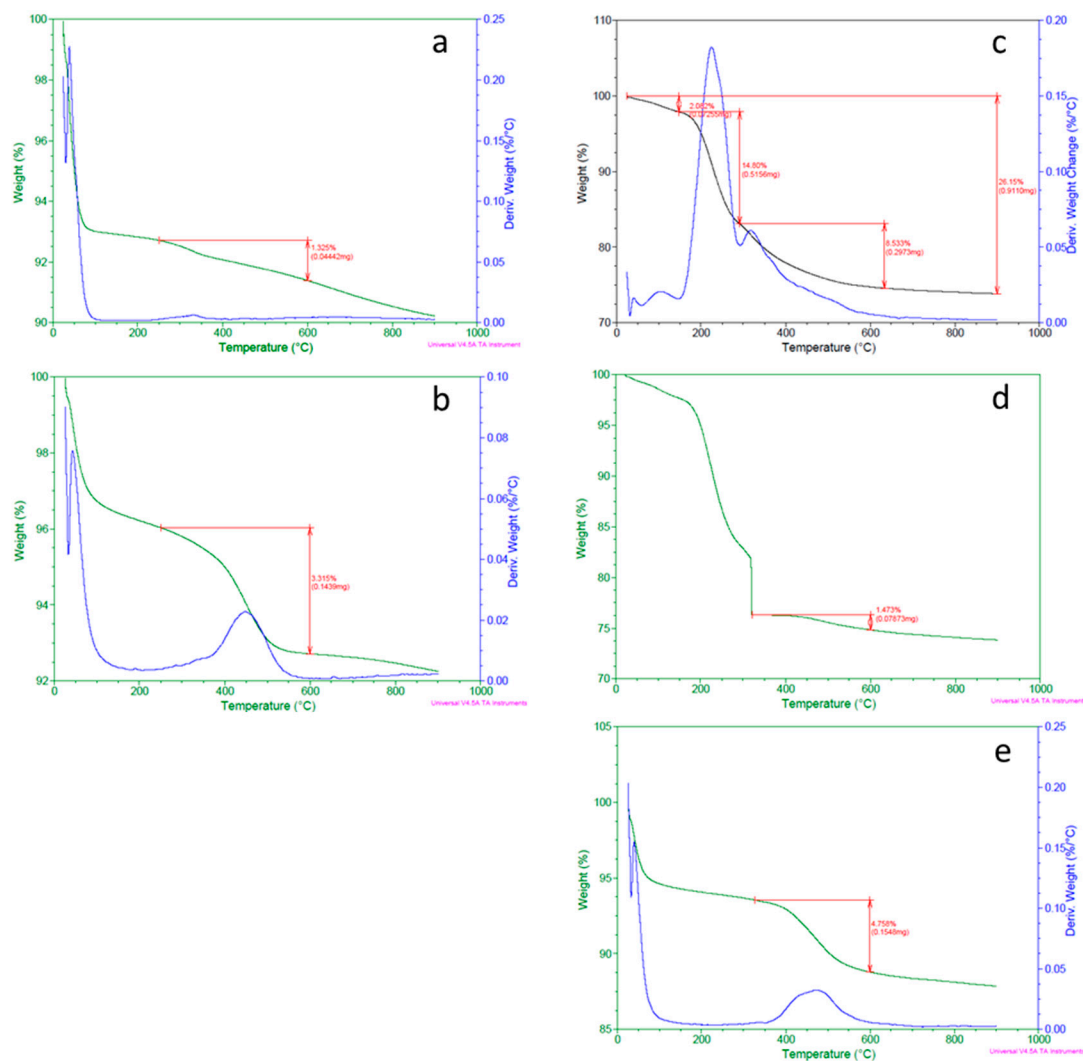

**Figure S3.** TGA profiles recorded on (a) c-SiO<sub>2</sub>@Fe<sub>3</sub>O<sub>4</sub>, (b) c-Magn-Humic, (c) SiO<sub>2</sub>@Fe<sub>3</sub>O<sub>4</sub>, (d) SiO<sub>2</sub>@Fe<sub>3</sub>O<sub>4</sub> after isothermal pre-treatment for 12 h at 320 °C, (e) Magn-Humic.

EDS analysis:

**Table S2.** Compositional results collected on the materials obtained after sol-gel compared to pristine magnetite.

| Material                                           | Si/O | Si/Fe |
|----------------------------------------------------|------|-------|
| Fe <sub>3</sub> O <sub>4</sub>                     | 0.00 | 0.00  |
| SiO <sub>2</sub> @Fe <sub>3</sub> O <sub>4</sub>   | 0.26 | 3.54  |
| c-SiO <sub>2</sub> @Fe <sub>3</sub> O <sub>4</sub> | 0.20 | 3.96  |

*MRM conditions*

**Table S3.** MRM conditions for HPLC-ESI-MS/MS analysis of the steroids.

| <b>Compound</b> | <b>Precursor ion* (m/z)</b> | <b>Product ion (m/z)</b> | <b>Dwell time</b> | <b>Fragmentor energy (V)</b> | <b>Collision energy (V)</b> | <b>Polarity</b> |
|-----------------|-----------------------------|--------------------------|-------------------|------------------------------|-----------------------------|-----------------|
| PREDLO          | 343                         | 147                      | 15                | 112                          | 20                          | Positive        |
|                 |                             | 91                       | 15                | 112                          | 72                          |                 |
| H-CORT          | 363                         | 121                      | 15                | 124                          | 20                          | Positive        |
|                 |                             | 91                       | 15                | 124                          | 68                          |                 |
| PRED            | 359                         | 341                      | 15                | 76                           | 4                           | Positive        |
|                 |                             | 147                      | 15                | 76                           | 24                          |                 |
| CORT            | 361                         | 163                      | 15                | 130                          | 20                          | Positive        |
|                 |                             | 105                      | 15                | 130                          | 48                          |                 |
| BETA            | 373                         | 355                      | 15                | 82                           | 8                           | Positive        |
|                 |                             | 147                      | 15                | 82                           | 24                          |                 |
| DEXA            | 373                         | 355                      | 15                | 76                           | 4                           | Positive        |
|                 |                             | 91                       | 15                | 76                           | 80                          |                 |
| TRIAM           | 415                         | 397                      | 15                | 130                          | 8                           | Positive        |
|                 |                             | 91                       | 15                | 130                          | 80                          |                 |
| FLUO            | 495                         | 475                      | 15                | 88                           | 0                           | Positive        |
|                 |                             | 337                      | 15                | 88                           | 8                           |                 |
| E2              | 271                         | 183                      | 100               | 166                          | 50                          | Negative        |
|                 |                             | 143                      | 100               | 166                          | 64                          |                 |
| TST             | 289                         | 109                      | 15                | 76                           | 24                          | Positive        |
|                 |                             | 97                       | 15                | 76                           | 20                          |                 |
| EPI             | 289                         | 253                      | 15                | 100                          | 20                          | Positive        |
|                 |                             | 109                      | 15                | 100                          | 25                          |                 |
|                 |                             | 97                       | 15                | 100                          | 20                          |                 |

|        |     |     |    |     |    |          |
|--------|-----|-----|----|-----|----|----------|
| EE2    | 295 | 145 | 50 | 154 | 44 | Negative |
|        |     | 143 | 50 | 154 | 68 |          |
| E1     | 269 | 145 | 15 | 148 | 44 | Negative |
|        |     | 143 | 15 | 148 | 60 |          |
| H-PROG | 331 | 109 | 15 | 118 | 28 | Positive |
|        |     | 97  | 15 | 118 | 24 |          |
| PROG   | 315 | 109 | 15 | 94  | 24 | Positive |
|        |     | 97  | 15 | 94  | 20 |          |
| M-PROG | 387 | 327 | 15 | 106 | 8  | Positive |
|        |     | 123 | 15 | 106 | 24 |          |

\*[M-H]<sup>-</sup> adduct for negative ion and [M+H]<sup>+</sup> adduct for positive ion.

Analytes are detected in the same chromatographic run by setting a polarity-switching tool. The chromatographic separation was done on a Zorbax Eclipse Plus C18 column (4.6 × 100 mm, 3.5 μm), equipped with a similar guard-column (Robusta C18 4.6 × 10 mm, 5 μm), maintained at 30 °C. Gradient elution (0.5 mL min<sup>-1</sup>) was performed by (A) aqueous 1 mM NH<sub>4</sub>F and (B) ACN: 30 % B for 0.5 min, linear gradient to 85 % B in 11.5 min, isocratic 85 % B for 5 min, to 98 % B in 0.5 min, hold for 2 min (washing step); the initial conditions (30 % B) were returned by 7-min equilibration time. The injection volume was 10 μL.

#### Bradford assay:

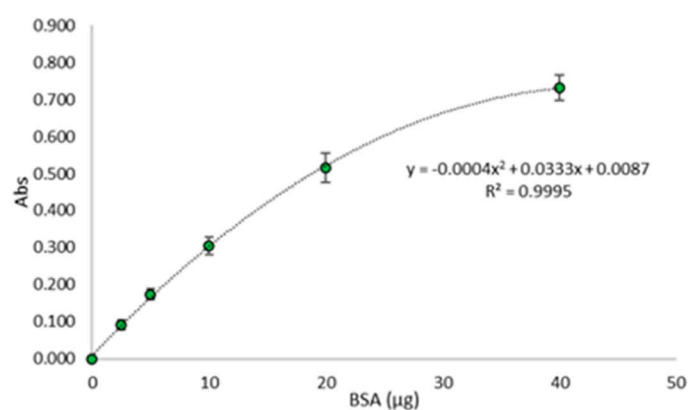

**Figure S4.** Mean calibration curve ( $n=6$ ) for the Bradford assay (0-40 μg protein, starting from a 50 mg L<sup>-1</sup> BSA standard solution in 0.01 M phosphate buffer, pH 7.2); spectrophotometric determination at  $\lambda_{\max}$  595 nm, 1 cm-optical path cuvette.

*Design of experiments:*

Table S4. Experimental domain of the variables selected for the 2<sup>2</sup> factorial design.

| Variable                               | Levels |    |
|----------------------------------------|--------|----|
|                                        | -1     | +1 |
| FBS volume (μL), x <sub>1</sub>        | 2      | 5  |
| Magn-Humic amount (mg), x <sub>2</sub> | 10     | 20 |

*MRM chromatograms:*

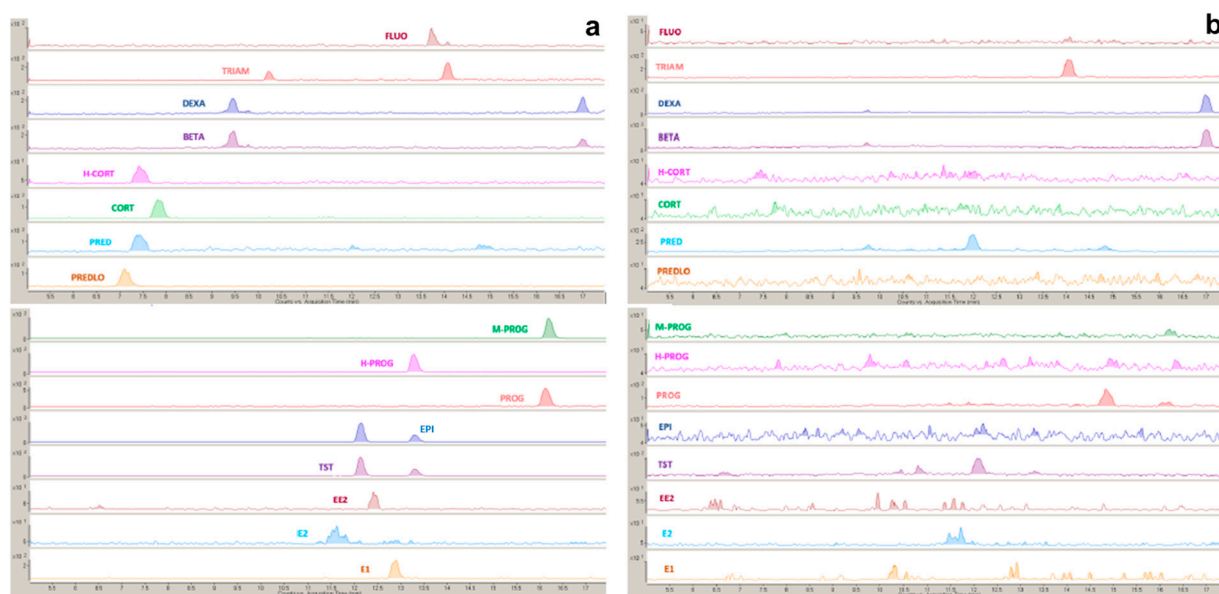

Figure S5. MRM chromatograms of MSPE eluates from (a) FBS spiked with 5 ng mL<sup>-1</sup> of each compound before extraction and (b) unspiked FBS.
